# Supplementary material
Source: MDPI journal article supplement (https://www.mdpi.com/1999-4907/12/12/1784)
Supplement: s1 [file s1]

## Review

# Potentials of Endophytic Fungi in the Biosynthesis of Versatile Secondary Metabolites and Enzymes

Houda Ben Slama <sup>1</sup>, Ali Chenari Bouket <sup>2</sup>, Faizah N. Alenezi <sup>3</sup>, Zeinab Pourhassan <sup>4</sup>, Patrycja Golińska <sup>5</sup>, Tomasz Oszako <sup>6</sup> and Lassaad Belbahri <sup>1,7\*</sup>

**Citation:** Slama, H.B.; Chenari Bouket, A.; Alenezi, F.N.; Pourhassan, Z.; Golińska, P.; Oszako, T.; Belbahri, L. Potentials of Endophytic Fungi in the Biosynthesis of Versatile Secondary Metabolites and Enzymes. *Forests* **2021**, *12*, 1784. <https://doi.org/10.3390/f12121784>

- <sup>1</sup> NextBiotech, 98 Rue Ali Belhouane, Agareb 3030, Tunisia; benslamahouda92@gmail.com
- <sup>2</sup> East Azarbaijan Agricultural and Natural Resources Research and Education Center, Plant Protection Research Department, Agricultural Research, Education and Extension Organization (AREEO), Tabriz 5355179854, Iran; a.chenari@areeo.ac.ir
- <sup>3</sup> The Public Authority for Applied Education and Training, Adailiyah 00965, Kuwait; Fn.alenazi@paaet.edu.kw
- <sup>4</sup> Department of Plant Protection, Faculty of Agriculture, University of Tabriz, Tabriz 516615731, Iran; zeinabpourhassan@gmail.com
- <sup>5</sup> Department of Microbiology, Faculty of Biological and Veterinary Sciences, Nicolaus Copernicus University, Toruń 87-100, Poland; golinska@umk.pl
- <sup>6</sup> Department of Forest Protection of the Forest Research Institute in Sekocin Stary, 05-090 Raszyn, Poland; T.Oszako@ibles.waw.pl
- <sup>7</sup> Laboratory of Soil Biology, University of Neuchâtel, 2000 Neuchâtel, Switzerland
- \* Correspondence: Lassaad.Belbahri@unige.ch

Academic Editor: Fred O. Asiegbo

Received: 5 November 2021

Accepted: 13 December 2021

Published: 16 December 2021

**Publisher's Note:** MDPI stays neutral with regard to jurisdictional claims in published maps and institutional affiliations.

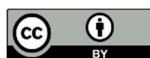

**Copyright:** © 2021 by the authors. Submitted for possible open access publication under the terms and conditions of the Creative Commons Attribution (CC BY) license (<http://creativecommons.org/licenses/by/4.0/>).

**Table S1.** Medicinal applications of novel secondary metabolites produced by endophytic fungi.

| Compounds                | Fungal endophytes                | Host plants                  | Biological activities                  | Structural formulas                                                                  | References             |
|--------------------------|----------------------------------|------------------------------|----------------------------------------|--------------------------------------------------------------------------------------|------------------------|
| Javanicin                | <i>Chloridium</i> sp.            | <i>Azadirachta indica</i>    | Antibacterial activity                 | 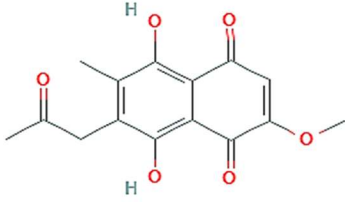   | (Kharwar et al., 2009) |
| Taxol                    | <i>Tubercularia</i> sp. TF5      | <i>Taxus mairei</i>          | Anticancer activity                    |    | (Wang et al., 2000)    |
| Pestacin                 | <i>Pestalotiopsis microspora</i> | -                            | Antioxidant and antimycotic activities |   | (Harper et al., 2003)  |
| 7-amino-4-methylcoumarin | <i>Xylaria</i> sp.YX-28          | <i>Ginkgo biloba</i>         | Antimicrobial activity                 |  | (Liu et al., 2008)     |
| Camptothecin             | -                                | <i>Camptotheca acuminata</i> | Antineoplastic agent                   |  | (Kusari et al., 2009)  |

|                            |                                       |                                    |                        |                                                                                                                                                                                     |                        |
|----------------------------|---------------------------------------|------------------------------------|------------------------|-------------------------------------------------------------------------------------------------------------------------------------------------------------------------------------|------------------------|
| Taxol                      | <i>Fusarium solani</i> ,<br>Tax-3     | <i>Taxus chinensis</i>             | Anticancerous activity | 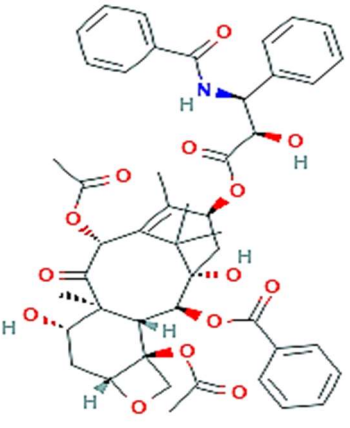                                                                                                  | (Deng et al., 2009)    |
| Pestalachlorides A–C (1-2) | <i>Pestalotiopsis adusta</i>          | -                                  | Antifungal activity    | <br><br>(1) (2) | (Li et al., 2008)      |
| Taxol                      | <i>Taxomyces andreanae</i>            | <i>Taxus brevifolia</i>            | Anticancerous activity |                                                                                                  | (Stierle et al., 1993) |
| Chaetominine               | <i>Chaetomium</i> sp.<br>IFB-E015     | <i>Adenophora axilliflora</i>      | Cytotoxic activity     |                                                                                                 | (Jiao et al., 2006)    |
| Graphislactone A           | <i>Cephalosporium</i> sp.<br>IFB-E001 | <i>Trachelospermum jasminoides</i> | Antioxidant activities |                                                                                                 | (Song et al., 2005)    |

|                                 |                               |                               |                                                                        |                                                                                                    |                           |
|---------------------------------|-------------------------------|-------------------------------|------------------------------------------------------------------------|----------------------------------------------------------------------------------------------------|---------------------------|
| Cytotoxic Acids A (1) and B (2) | <i>Cytospora</i> sp.          | -                             | Tridepside Inhibitors of hCMV Protease                                 | 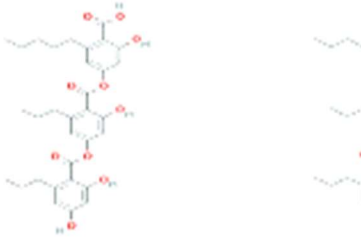<br><b>(1)</b>   | (Guo et al., 2000)        |
| Hinnuliquinone                  | -                             | -                             | Inhibit HIV-1                                                          |                  | (Singh et al., 2004)      |
| Phomoxanthones A and B          | <i>Phomopsis</i> sp. BCC 1323 | -                             | Antimalarial and antitubercular activities and cytotoxicity            | <br><b>(1)</b> | (Isaka et al., 2001)      |
| Tenuazonic Acid                 | <i>Alternaria alternata</i>   | -                             | Antibacterial activity against <i>Mycobacterium tuberculosis</i> H37Rv |                | (Sonaimuthu et al., 2011) |
| Subglutinol A                   | <i>Fusarium subglutinans</i>  | <i>Tripterygium wilfordii</i> | Immunosuppressive activity                                             |                | (Lin et al., 2014)        |
| Ergoflavin                      | -                             | <i>Mimosops elengi</i>        | Anti-Inflammatory and Anticancer Activity                              |                | (Deshmukh et al., 2009)   |

|                                                                   |                                 |                                  |                        |                                                                                      |                            |
|-------------------------------------------------------------------|---------------------------------|----------------------------------|------------------------|--------------------------------------------------------------------------------------|----------------------------|
| Podophyllotoxin                                                   | -                               | <i>Podophyllum peltatum</i>      | Anticancer agent       | 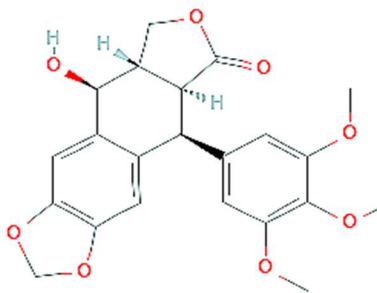   | (Ardalani et al., 2017)    |
| Brefeldin A                                                       | <i>Penicillium</i> sp. FKI-7127 | -                                | Antiviral activity     |    | (Raekiansyah et al., 2017) |
| 14-nordrimane                                                     | <i>Phoma</i> sp.                | <i>Aconitum vilmorinianum</i> .  | Antiviral activity     |   | (Liu et al., 2019)         |
| Anthraquinone, 7-( $\gamma,\gamma$ )-dimethylallyloxy macrosporin | <i>Phoma</i> sp. L28.           | Mangrove                         | Antifungal activity    |  | (Huang et al., 2017)       |
| Xylabisboein A and B                                              | <i>Xylaria</i> sp. SNB-GTC2501  | <i>Bisboecklera microcephala</i> | Antibacterial activity |  | (Sorres et al., 2015)      |
| Brasilamides A (1), B (2) and F (3)                               | <i>Penicillium brasilianum</i>  | <i>Melia azedarach</i>           | Anticancer activity    |  | (Fill et al., 2010)        |

|                      |                                      |                            |                                               |                                                                                      |                      |
|----------------------|--------------------------------------|----------------------------|-----------------------------------------------|--------------------------------------------------------------------------------------|----------------------|
| Griseofulvin         | <i>Xylaria</i> sp.F0010              | <i>Abies</i> sp.           | Antifungal activity                           | 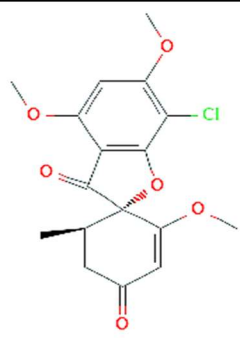   | (PARK et al., 2005)  |
| Chaetomugilin D      | <i>Chaetomium globosum</i>           | <i>Ginkgo biloba</i>       | Antimicrobial activity                        |    | (Qin et al., 2009)   |
| Peniisocoumarins A–J | <i>Penicillium commune</i> QQF-3     | <i>Kandelia candel</i>     | Cytotoxicity and enzyme inhibitory activities |   | (Cai et al., 2018)   |
| Amestolkolides A–D   | <i>Talaromyces amestolkiae</i> YX1   | Mangrove                   | Anti-inflammatory                             |  | (Chen et al., 2018)  |
| Fusariumins C and D  | <i>Fusarium oxysporum</i> ZZP-R1     | <i>Rumex madaio</i>        | Antimicrobial activities                      |  | (Chen et al., 2019a) |
| Koninginols A–C      | <i>Trichoderma koningiopsis</i> A729 | <i>Morinda officinalis</i> | Antitumor activity                            |  | (Chen et al., 2019b) |

|                                         |                                          |                            |                                                        |                                                                                      |                          |
|-----------------------------------------|------------------------------------------|----------------------------|--------------------------------------------------------|--------------------------------------------------------------------------------------|--------------------------|
| 11-hydroxy-15-drimeneoic acid           | <i>Trichoderma koningiopsis</i> A729     | <i>Morinda officinalis</i> | Antitumor activity                                     |    | (Chen et al., 2019b)     |
| Koninginol D                            | <i>Trichoderma koningiopsis</i> A729     | <i>Morinda officinalis</i> | Antitumor activity                                     |    | (Chen et al., 2019b)     |
| Neofusnaphthoquinone A                  | <i>Neofusicoccum austral</i> SYSU-SKS024 | Mangrove                   | Indoleamine 2, 3-dioxygenase (IDO) inhibitory activity |   | (Cui et al., 2018)       |
| 6-(1-methoxyethyl)-2,7-dimethoxyjuglone | <i>Neofusicoccum austral</i> SYSU-SKS024 | Mangrove                   | Indoleamine 2, 3-dioxygenase (IDO) inhibitory activity |  | (Cui et al., 2018)       |
| (3R,4R)-3-methoxybotryosphaerone D      | <i>Neofusicoccum austral</i> SYSU-SKS024 | Mangrove                   | Indoleamine 2, 3-dioxygenase (IDO) inhibitory activity |  | (Cui et al., 2018)       |
| Citriquinochroman                       | <i>Penicillium citrinum</i>              | <i>Ceratonia siliqua</i>   | Cytotoxic activity                                     |  | (El-Neketi et al., 2013) |

|                                        |                             |                          |                                             |                                                                                      |                                 |
|----------------------------------------|-----------------------------|--------------------------|---------------------------------------------|--------------------------------------------------------------------------------------|---------------------------------|
| Tanzawaic acids<br>G and H             | <i>Penicillium citrinum</i> | <i>Ceratonia siliqua</i> | -                                           | 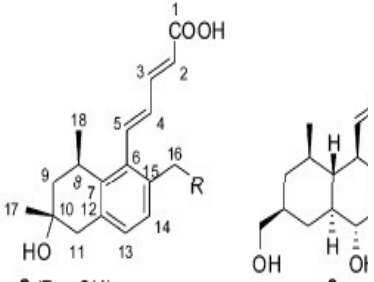   | (El-Neketi et al., 2013)        |
| 6-methylcurvulinic acid                | <i>Penicillium citrinum</i> | <i>Ceratonia siliqua</i> | -                                           |    | (El-Neketi et al., 2013)        |
| 8-methoxy-3,5-dimethylisoquinolin-6-ol | <i>Penicillium citrinum</i> | <i>Ceratonia siliqua</i> | -                                           |   | (El-Neketi et al., 2013)        |
| 1,2,3,11b-tetrahydroquinolactide       | <i>Penicillium citrinum</i> | <i>Ceratonia siliqua</i> | -                                           |  | (El-Neketi et al., 2013)        |
| Pipicolisporin                         | <i>Nigrospora oryzae</i>    | <i>Triticum aestivum</i> | Antimalarial and Antitrypanosome activities |  | (Fernández-Pastor et al., 2021) |



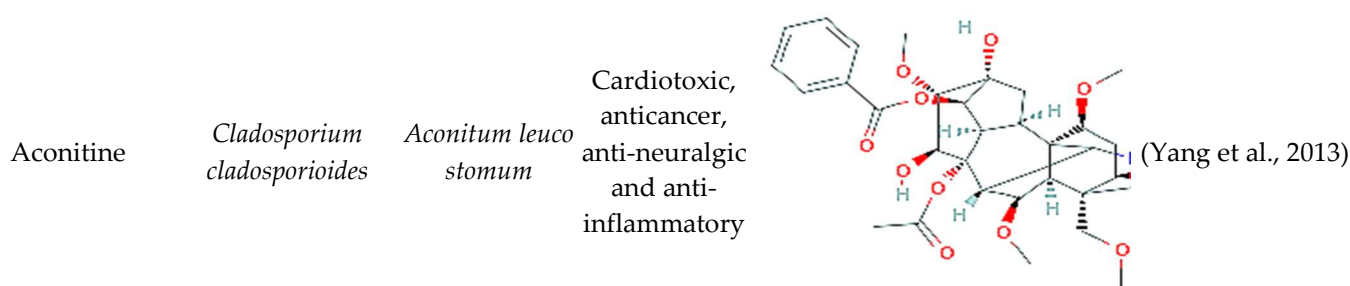

Ardalani, H., Avan, A., and Ghayour-Mobarhan, M. (2017). Podophyllotoxin: a novel potential natural anticancer agent. *Avicenna J. Phytomedicine* 7, 285.

Cai, R., Wu, Y., Chen, S., Cui, H., Liu, Z., Li, C., et al. (2018). Peniisocoumarins A–J: Isocoumarins from *Penicillium commune* QQF-3, an Endophytic Fungus of the Mangrove Plant *Kandelia candel*. *J. Nat. Prod.* 81, 1376–1383. doi:10.1021/acs.jnatprod.7b01018.

Chen, J., Bai, X., Hua, Y., Zhang, H., and Wang, H. (2019a). Fusariumins C and D, two novel antimicrobial agents from *Fusarium oxysporum* ZZP-R1 symbiotic on *Rumex madaio* Makino. *Fitoterapia* 134, 1–4. doi:10.1016/j.fitote.2019.01.016.

Chen, S., Ding, M., Liu, W., Huang, X., Liu, Z., Lu, Y., et al. (2018). Anti-inflammatory meroterpenoids from the mangrove endophytic fungus *Talaromyces amestolkiae* YX1. *Phytochemistry* 146, 8–15.

Chen, S., Li, H., Chen, Y., Li, S., Xu, J., Guo, H., et al. (2019b). Three new diterpenes and two new sesquiterpenoids from the endophytic fungus *Trichoderma koningiopsis* A729. *Bioorganic Chem.* 86, 368–374. doi:10.1016/j.bioorg.2019.02.005.

Cui, H., Zhang, H., Liu, Y., Gu, Q., Xu, J., Huang, X., et al. (2018). Ethylnaphthoquinone derivatives as inhibitors of indoleamine-2, 3-dioxygenase from the mangrove endophytic fungus *Neofusicoccum austral* SYSU-SKS024. *Fitoterapia* 125, 281–285.

Deng, B. W., Liu, K. H., Chen, W. Q., Ding, X. W., and Xie, X. C. (2009). *Fusarium solani*, Tax-3, a new endophytic taxol-producing fungus from *Taxus chinensis*. *World J. Microbiol. Biotechnol.* 25, 139–143.

Deshmukh, S. K., Mishra, P. D., Kulkarni-Almeida, A., Verekar, S., Sahoo, M. R., Periyasamy, G., et al. (2009). Anti-inflammatory and anticancer activity of ergoflavin isolated from an endophytic fungus. *Chem. Biodivers.* 6, 784–789.

El-Neketi, M., Ebrahim, W., Lin, W., Gedara, S., Badria, F., Saad, H.-E. A., et al. (2013). Alkaloids and polyketides from *Penicillium citrinum*, an endophyte isolated from the Moroccan plant *Ceratonia siliqua*. *J. Nat. Prod.* 76, 1099–1104.

Fernández-Pastor, I., González-Menéndez, V., Annang, F., Toro, C., Mackenzie, T. A., Bosch-Navarrete, C., et al. (2021). Pipecolisporin, a Novel Cyclic Peptide with Antimalarial and Antitrypanosome Activities from a Wheat Endophytic *Nigrospora oryzae*. *Pharmaceutics* 14, 268.

Fill, T. P., Silva, B. F. D., and Rodrigues-Fo, E. (2010). Biosynthesis of phenylpropanoid amides by an endophytic *penicillium brasilianum* found in root bark of *Melia azedarach*. *J. Microbiol. Biotechnol.* 20, 622–629.

- Guo, B., Dai, J.-R., Ng, S., Huang, Y., Leong, C., Ong, W., et al. (2000). Cytonic Acids A and B: Novel Tridepside Inhibitors of hCMV Protease from the Endophytic Fungus *Cytonaema* Species. *J. Nat. Prod.* 63, 602–604. doi:10.1021/np990467r.
- Harper, J. K., Arif, A. M., Ford, E. J., Strobel, G. A., Porco Jr, J. A., Tomer, D. P., et al. (2003). Pestacin: a 1, 3-dihydro isobenzofuran from *Pestalotiopsis microspora* possessing antioxidant and antimycotic activities. *Tetrahedron* 59, 2471–2476.
- Huang, S., Xu, J., Li, F., Zhou, D., Xu, L., and Li, C. (2017). Identification and Antifungal Activity of Metabolites from the Mangrove Fungus *Phoma* sp. L28. *Chem. Nat. Compd.* 53, 237–240. doi:10.1007/s10600-017-1961-z.
- Isaka, M., Jaturapat, A., Rukseree, K., Danwisetkanjana, K., Tanticharoen, M., and Thebtaranonth, Y. (2001). Phomoxanthonones A and B, novel xanthone dimers from the endophytic fungus *Phomopsis* species. *J. Nat. Prod.* 64, 1015–1018.
- Jiao, R. H., Xu, S., Liu, J. Y., Ge, H. M., Ding, H., Xu, C., et al. (2006). Chaetominine, a cytotoxic alkaloid produced by endophytic *Chaetomium* sp. IFB-E015. *Org. Lett.* 8, 5709–5712.
- Kharwar, R. N., Verma, V. C., Kumar, A., Gond, S. K., Harper, J. K., Hess, W. M., et al. (2009). Javanicin, an antibacterial naphthaquinone from an endophytic fungus of neem, *Cloridium* sp. *Curr. Microbiol.* 58, 233–238.
- Kusari, S., Zühlke, S., and Spiteller, M. (2009). An endophytic fungus from *Camptotheca acuminata* that produces camptothecin and analogues. *J. Nat. Prod.* 72, 2–7.
- Li, E., Jiang, L., Guo, L., Zhang, H., and Che, Y. (2008). Pestalachlorides A–C, antifungal metabolites from the plant endophytic fungus *Pestalotiopsis adusta*. *Bioorganic Med. Chem.* 16, 7894–7899.
- Lin, R., Kim, H., Hong, J., and Li, Q.-J. (2014). Biological Evaluation of Subglutinin A As a Novel Immunosuppressive Agent for Inflammation Intervention. *ACS Med. Chem. Lett.* 5, 485–490. doi:10.1021/ml4004809.
- Liu, S.-S., Jiang, J.-X., Huang, R., Wang, Y.-T., Jiang, B.-G., Zheng, K.-X., et al. (2019). A new antiviral 14-nordrimane sesquiterpenoid from an endophytic fungus *Phoma* sp. *Phytochem. Lett.* 29, 75–78.
- Liu, X., Dong, M., Chen, X., Jiang, M., Lv, X., and Zhou, J. (2008). Antimicrobial activity of an endophytic *Xylaria* sp. YX-28 and identification of its antimicrobial compound 7-amino-4-methylcoumarin. *Appl. Microbiol. Biotechnol.* 78, 241–247.
- PARK, J.-H., CHOI, G.-J., LEE, S.-W., LEE, H.-B., KIM, K.-M., JUNG, H.-S., et al. (2005). Griseofulvin from *Xylaria* sp. strain F0010, an endophytic fungus of *Abies holophylla* and its antifungal activity against plant pathogenic fungi. *J. Microbiol. Biotechnol.* 15, 112–117.
- Qin, J.-C., Zhang, Y.-M., Gao, J.-M., Bai, M.-S., Yang, S.-X., Laatsch, H., et al. (2009). Bioactive metabolites produced by *Chaetomium globosum*, an endophytic fungus isolated from *Ginkgo biloba*. *Bioorganic Med. Chem. Lett.* 19, 1572–1574. doi:10.1016/j.bmcl.2009.02.025.
- Raekiansyah, M., Mori, M., Nonaka, K., Agoh, M., Shiomi, K., Matsumoto, A., et al. (2017). Identification of novel antiviral of fungus-derived brefeldin A against dengue viruses. *Trop. Med. Health.* 45, 32. doi:10.1186/s41182-017-0072-7.
- Singh, S. B., Ondeyka, J. G., Tsipouras, N., Ruby, C., Sardana, V., Schulman, M., et al. (2004). Hinnuliquinone, a C2-symmetric dimeric non-peptide fungal metabolite inhibitor of HIV-1 protease. *Biochem. Biophys. Res. Commun.* 324, 108–113. doi:10.1016/j.bbrc.2004.08.234.

- Sonaimuthu, V., Parihar, S., Prakash Thakur, J., Luqman, S., Saikia, D., Chanotiya, C. S., et al. (2011). Tenuazonic acid: a promising antitubercular principle from *Alternaria alternate*. *Microbiol. Res.* 2, 63–65.
- Song, Y. C., Huang, W. Y., Sun, C., Wang, F. W., and Tan, R. X. (2005). Characterization of Graphislactone A as the Antioxidant and Free Radical-Scavenging Substance from the Culture of *Cephalosporium* sp. IFB-E001, an Endophytic Fungus in *Trachelospermum jasminoides*. *Biol. Pharmaceut. Bull.* 28, 506–509. doi:10.1248/bpb.28.506.
- Sorres, J., Nirma, C., Touré, S., Eparvier, V., and Stien, D. (2015). Two new isopimarane diterpenoids from the endophytic fungus *Xylaria* sp. SNB-GTC2501. *Tetrahed. Lett.* 56, 4596–4598. doi:10.1016/j.tetlet.2015.06.022.
- Stierle, A., Strobel, G., and Stierle, D. (1993). Taxol and taxane production by *Taxomyces andreanae*, an endophytic fungus of Pacific yew. *Science* 260, 214–216.
- Wang, J., Li, G., Lu, H., Zheng, Z., Huang, Y., and Su, W. (2000). Taxol from *Tubercularia* sp. strain TF5, an endophytic fungus of *Taxus mairei*. *FEMS Microbiol. Lett.* 193, 249–253.
- Yang, K., Liang, J., Li, Q., Kong, X., Chen, R., and Jin, Y. (2013). *Cladosporium cladosporioides* XJ-AC03, an aconitine-producing endophytic fungus isolated from *Aconitum leucostomum*. *World J. Microbiol. Biotechnol.* 29, 933–938.

**Table S2.** Agricultural applications of novel secondary metabolites produced by endophytic fungi.

| Compounds                    | Fungal endophytes                  | Host plants                    | Biological activities     | Structural formulas                                                                                                                                          | References            |
|------------------------------|------------------------------------|--------------------------------|---------------------------|--------------------------------------------------------------------------------------------------------------------------------------------------------------|-----------------------|
| Naphtalene                   | <i>Muscodor vitigenus</i>          | <i>Paullinia paullinioides</i> | Insect repellent activity | 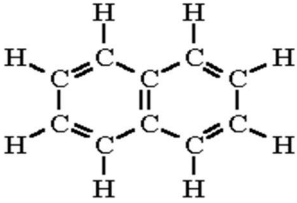                                                                           | (Daisy et al., 2002)  |
| Azadirachtin                 | <i>Azadirachta indica</i>          | -                              | Insecticidal activity     |                                                                           | (Verma et al., 2014)  |
| Chaetoglobosin A             | <i>Chaetomium</i> spp.             | -                              | Antifungal activity       |                                                                          | (Ortega et al., 2020) |
| Talaromyones A (1) and B (2) | <i>Talaromyces stipitatus</i> SK-4 | <i>Acanthus ilicifolius</i>    | Antibacterial activity    |  <p>1: R = OH<br/>2: R = OAc</p>                                         | (Cai et al., 2017)    |
| Fusaristin A                 | <i>Phomopsis</i> sp.               | -                              | Antimicrobial activity    |  <p>R1 = <math>\text{CH}_2\text{CH}_2\text{CH}_2\text{CONH}_2</math></p> | (Lim et al., 2010)    |

|                            |                                 |                             |                                        |                                                                                                   |                                |
|----------------------------|---------------------------------|-----------------------------|----------------------------------------|---------------------------------------------------------------------------------------------------|--------------------------------|
| Phomoxanthone A            | <i>Phomopsis</i> sp             | <i>Costus</i> sp            | Antimicrobial activity                 | 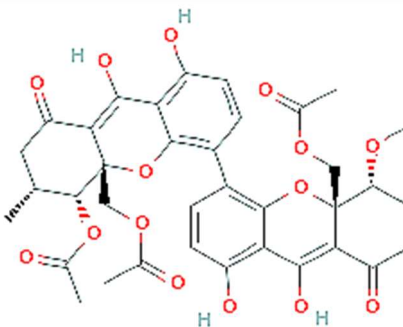                | (Elsässer et al., 2005)        |
| Botryosphaerones A-D (1-4) | <i>Botryosphaeria australis</i> | <i>Sonneratia apetala</i>   | Cytotoxic and antimicrobial activities | <br>(1) (2) (3) | (Xu et al., 2011)              |
| 5-Methylmellein            | <i>Xylaria</i> sp. PSUG12       | <i>Garcinia hombroniana</i> | Insecticidal activity                  |                 | (Rukachaisirikul et al., 2013) |
| 4-epi-ethiosolide          | <i>Pezicula</i> sp.             | Coniferous tree             | Fungicidal and herbicidal activities   |               | (Schulz et al., 1995)          |
| (+)-cryptosporiopsin       | <i>Pezicula</i> sp.             | Coniferous tree             | Fungicidal and herbicidal activities   |               | (Schulz et al., 1995)          |
| (-)-mycorrhizin A          | <i>Pezicula</i> sp.             | Coniferous tree             | Fungicidal and herbicidal activities   |               | (Schulz et al., 1995)          |

|                                          |                     |                 |                                      |                                                                                    |                       |
|------------------------------------------|---------------------|-----------------|--------------------------------------|------------------------------------------------------------------------------------|-----------------------|
| 4-Hydroxy-2-methoxy-6-methylbenzaldehyde | <i>Pezicula</i> sp. | Coniferous tree | Fungicidal and herbicidal activities | 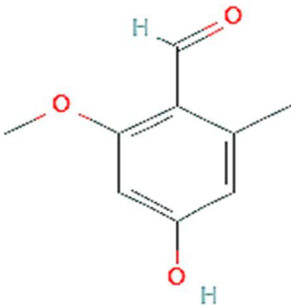 | (Schulz et al., 1995) |
| (R)-mellein                              | <i>Pezicula</i> sp. | Coniferous tree | Fungicidal and herbicidal activities |  | (Schulz et al., 1995) |

Cai, R., Chen, S., Long, Y., Li, C., Huang, X., and She, Z. (2017). Depsidones from *Talaromyces stipitatus* SK-4, an endophytic fungus of the mangrove plant *Acanthus ilicifolius*. *Phytochem. Lett.* 20, 196–199. doi:10.1016/j.phytol.2017.04.023.

Daisy, B. H., Strobel, G. A., Castillo, U., Ezra, D., Sears, J., Weaver, D. K., et al. (2002). Naphthalene, an insect repellent, is produced by *Muscodor vitigenus*, a novel endophytic fungus. *Microbiology* 148, 3737–3741.

Elsässer, B., Krohn, K., Flörke, U., Root, N., Aust, H.-J., Draeger, S., et al. (2005). X-ray Structure Determination, Absolute Configuration and Biological Activity of Phomoxanthone A. *Eur. J. Org. Chem.* 2005, 4563–4570. doi:10.1002/ejoc.200500265.

Lim, C.-S., Kim, J.-Y., Choi, J.-N., Ponnusamy, K., Jeon, Y.-T., Kim, S.-U., et al. (2010). Identification, fermentation, and bioactivity against *Xanthomonas oryzae* of antimicrobial metabolites isolated from *Phomopsis longicolla* S1B4. *J. Microbiol. Biotechnol.* 20, 494–500.

Ortega, H. E., Torres-Mendoza, D., and Cubilla-Rios, L. (2020). Patents on Endophytic Fungi for Agriculture and Bio- and Phytoremediation Applications. *Microorganisms* 8, 1237.

Rukachaisirikul, V., Buadam, S., Sukpondma, Y., Phongpaichit, S., Sakayaroj, J., and Hutadilok-Towatana, N. (2013). Indanone and mellein derivatives from the *Garcinia*-derived fungus *Xylaria* sp. PSU-G12. *Phytochem. Lett.* 6, 135–138.

Schulz, B., Sucker, J., Aust, H. J., Krohn, K., Ludewig, K., Jones, P. G., et al. (1995). Biologically active secondary metabolites of endophytic *Pezicula* species. *Mycol. Res.* 99, 1007–1015.

Verma, V. C., Prakash, S., Singh, R. G., and Gange, A. C. (2014). “Host-mimetic metabolomics of endophytes: looking back into the future,” in *Advances in Endophytic Research* (Springer), 203–218.

Xu, Y.-H., Lu, C.-H., Zheng, Z.-H., and Shen, Y.-M. (2011). New Polyketides Isolated from *Botryosphaeria australis* Strain ZJ12-1A. *Helv. Chimica. Acta.* 94, 897–902.

**Table S3.** Industrial applications of extracellular enzymes produced by endophytic fungi.

| Compounds | Fungal endophytes               | Host plants                      | Biological activities                                                                               | References                         |
|-----------|---------------------------------|----------------------------------|-----------------------------------------------------------------------------------------------------|------------------------------------|
| Amylase   | <i>Streptosporangium</i> sp.    | <i>Zea mays</i>                  | Starch hydrolysis                                                                                   | (Stamford et al., 2002)            |
| Amylase   | <i>Cylindrocephalum</i> sp.     | <i>Alpinia calcarata</i>         | Starch hydrolysis                                                                                   | (Sunitha. et al., 2012)            |
| Lipase    | <i>Fusarium oxysporum</i>       | <i>Croton oblongifolius</i>      | Catalyze a wide range of chemical reactions in aqueous and non-aqueous environments                 | (Panuthai et al., 2012)            |
| Protease  | <i>Fusarium</i> sp. CPCC 480097 | <i>Chrysanthemum</i>             | Proteins degradation                                                                                | (Wu et al., 2009)                  |
| Lipase    | <i>Cercospora kikuchii</i>      | -                                | Catalyze the hydrolysis of triacylglycerols to fatty acids, mono- and diacylglycerols, and glycerol | (Costa-Silva et al., 2011)         |
| Cellulase | <i>Xylaria</i> sp.              | <i>Opuntia ficus-indica</i>      | Hydrolysis of cellulose                                                                             | (Bezerra et al., 2012)             |
| Pectinase | <i>Penicillium glandicola</i>   | <i>Opuntia ficus-indica</i>      | Hydrolysis of pectine                                                                               | (Bezerra et al., 2012)             |
| Cellulase | <i>Penicillium</i> sp.          | <i>Centella asiatica</i>         | Cellulose degradation                                                                               | (Devi et al., 2012)                |
| Cellulase | <i>Fusarium oxysporum</i>       | <i>Baccharis dracunculifolia</i> | Catalyze cellulolysis                                                                               | (Onofre et al., 2013)              |
| Amylase   | <i>Aspergillus</i>              | -                                | Starch hydrolysis                                                                                   | (Khan et al., 2017)                |
| Xylanase  | <i>Alternaria alternata</i>     | <i>Croton oblongifolius</i>      | Degrade $\beta$ -1, 4-xylan                                                                         | (Wipusaree et al., 2011)           |
| Xylanase  | <i>Aspergillus terreus</i>      | <i>Memora peregrine</i>          | Degrade $\beta$ -1, 4-xylan                                                                         | (Sorgatto et al., 2012)            |
| Lipase    | <i>Cercospora kikuchii</i>      | <i>Tithonia diversifolia</i>     | Catalyze the hydrolysis of triacylglycerols                                                         | (Costa-Silva et al., 2011)         |
| Lipase    | <i>Fusarium oxysporum</i>       | <i>Croton oblongifolius</i>      | Catalyze the hydrolysis of triacylglycerols                                                         | (Amirita et al., 2012)             |
| Pectinase | <i>Penicillium chrysogenum</i>  | <i>Asclepias sinaica</i>         | Hydrolyze pectin substances                                                                         | (Fouda et al., 2015)               |
| Pectinase | <i>Piriformospora indica</i>    | -                                | Hydrolyze pectin substances                                                                         | (Heidarizadeh et al., 2018)        |
| Phytase   | <i>Azospirillum</i> spp.        | <i>Oryza sativa</i>              | Phytates degradation                                                                                | (Mehdipour-Moghaddam et al., 2010) |
| Protease  | <i>Alternaria alternata</i>     | -                                | Proteins degradation                                                                                | (Rajput et al., 2016)              |
| Chitinase | <i>Streptomyces griseus</i>     | <i>Citrus reticulata</i>         | Chitin hydrolysis                                                                                   | (Quecine et al., 2008)             |

Amirita, A., Sindhu, P., Swetha, J., Vasanthi, N. S., and Kannan, K. P. (2012). Enumeration of endophytic fungi from medicinal plants and screening of extracellular enzymes. *World J. Sci. Technol.* 2, 13–19.

Bezerra, J. D. P., Santos, M. G. S., Svedese, V. M., Lima, D. M. M., Fernandes, M. J. S., Paiva, L. M., et al. (2012). Richness of endophytic fungi isolated from *Opuntia ficus-indica* Mill. (Cactaceae) and preliminary screening for enzyme production. *World J. Microbiol. Biotechnol.* 28, 1989–1995. doi:10.1007/s11274-011-1001-2.

Costa-Silva, T. A., Nogueira, M. A., Souza, C. R. F., Oliveira, W. P., and Said, S. (2011). Lipase Production by Endophytic Fungus *Cercospora kikuchii*: Stability of Enzymatic Activity after Spray Drying in the Presence of Carbohydrates. *Drying Technol.* 29, 1112–1119. doi:10.1080/07373937.2011.573153.

Devi, N. N., Prabakaran, J. J., and Wahab, F. (2012). Phytochemical analysis and enzyme analysis of endophytic fungi from *Centella asiatica*. *Asian Pac. J. Trop. Biomed.* 2, S1280–S1284.

- Fouda, A. H., Hassan, S. E.-D., Eid, A. M., and Ewais, E. E.-D. (2015). Biotechnological applications of fungal endophytes associated with medicinal plant *Asclepias sinaica* (Bioss.). *Ann. Agric. Sci.* 60, 95–104.
- Heidarizadeh, M., Rezaei, P. F., and Shahabivand, S. (2018). Novel pectinase from *Piriformospora indica*, optimization of growth parameters and enzyme production in submerged culture condition. *Turk. J. Biochem.* 43, 289–295.
- Khan, A. L., Shahzad, R., Al-Harrasi, A., and Lee, I.-J. (2017). “Endophytic microbes: a resource for producing extracellular enzymes,” in *Endophytes: Crop productivity and protection* (Springer), 95–110.
- Mehdipour-Moghaddam, M. J., Emtiazi, G., Bouzari, M., Mostajeran, A., and Salehi, Z. (2010). Novel phytase and cellulase activities in endophytic *Azospirilla*. *W. Appl. Sci. J.* 10, 1129–1135.
- Onofre, S. B., Mattiello, S. P., da Silva, G. C., Groth, D., and Malagi, I. (2013). Production of cellulases by the endophytic fungus *Fusarium oxysporum*. *J. Microbiol. Res.* 3, 131–134.
- Panuthai, T., Sihanonth, P., Piapukiew, J., Sooksai, S., Sangvanich, P., and Karnchanatat, A. (2012). An extracellular lipase from the endophytic fungi *Fusarium oxysporum* isolated from the Thai medicinal plant, *Croton oblongifolius* Roxb. *Afr. J. Microbiol. Res.* 6, 2622–2638.
- Quecine, M. C., Araujo, W. L., Marcon, J., Gai, C. S., Azevedo, J. L., and Pizzirani-Kleiner, A. A. (2008). Chitinolytic activity of endophytic *Streptomyces* and potential for biocontrol. *Lett. Appl. Microbiol.* 47, 486–491. doi:10.1111/j.1472-765X.2008.02428.x.
- Rajput, K., Chanyal, S., and Agrawal, P. K. (2016). Optimization of protease production by endophytic fungus, *Alternaria alternata* isolated from gymnosperm tree-Cupressus torulosa D Don. *World J. Pharm. Pharmaceut. Sci.* 5, 1034–1054.
- Sorgatto, M., Guimarães, N. C. A., Zanoelo, F. F., Marques, M. R., Peixoto-Nogueira, S. C., and Giannesi, G. G. (2012). Purification and characterization of an extracellular xylanase produced by the endophytic fungus, *Aspergillus terreus*, grown in submerged fermentation. *Afr. J. Biotechnol.* 11, 8076–8084.
- Stamford, T. L. M., Stamford, N. P., Coelho, L., and Araujo, J. M. (2002). Production and characterization of a thermostable glucoamylase from *Streptosporangium* sp. endophyte of maize leaves. *Bioresour. Technol.* 83, 105–109.
- Sunitha., V. H., Ramesha., A., Savitha., J., and Srinivas., C. (2012). Amylase production by endophytic fungi *Cylindrocephalum* sp. isolated from medicinal plant *Alpinia calcarata* (Haw.) Roscoe. *Braz. J. Microbiol.* 43, 1213–1221. doi:10.1590/S1517-83822012000300049.
- Wipusaree, N., Sihanonth, P., Piapukiew, J., Sangvanich, P., and Karnchanatat, A. (2011). Purification and characterization of a xylanase from the endophytic fungus *Alternaria alternata* isolated from the Thai medicinal plant, *Croton oblongifolius* Roxb. *Afr. J. Microbiol. Res.* 5, 5697–5712.
- Wu, B., Wu, L., Chen, D., Yang, Z., and Luo, M. (2009). Purification and characterization of a novel fibrinolytic protease from *Fusarium* sp. CPCC 480097. *J. Ind. Microbiol. Biotechnol.* 36, 451–459.
